# Supplementary material for: Clinical efficacy and biomarker analysis of dual PD-1/CTLA-4 blockade in recurrent/metastatic EBV-associated nasopharyngeal carcinoma
Source: Springer Nature journal article supplement (doi:10.1038/s41467-023-38407-7), 2023-05-15
Supplement: MOESM1 [file 41467_2023_38407_MOESM1_ESM.pdf]

# **Clinical efficacy and biomarker analysis of dual PD-1/CTLA-4 blockade in recurrent/metastatic EBV-associated nasopharyngeal carcinoma**

## **Supplementary Information**

|                                                                                           |           |
|-------------------------------------------------------------------------------------------|-----------|
| <b>Supplementary Table 1. Patient characteristics</b>                                     | <b>2</b>  |
| <b>Supplementary Table 2. Details on treatment-related adverse events</b>                 | <b>4</b>  |
| <b>Supplementary Table 3. Prior treatment and EBV associations with depth of response</b> | <b>5</b>  |
| <b>Supplementary Table 4. Samples for exploratory analysis.</b>                           | <b>6</b>  |
| <b>Supplementary Table 5. Antibodies used for multiplex IHC/IF staining</b>               | <b>7</b>  |
| <b>Supplementary Figure 1</b>                                                             | <b>8</b>  |
| <b>Supplementary Figure 2.</b>                                                            | <b>9</b>  |
| <b>Supplementary Figure 3.</b>                                                            | <b>10</b> |
| <b>Supplementary Figure 4.</b>                                                            | <b>11</b> |
| <b>Supplementary References</b>                                                           | <b>13</b> |

**Supplementary Table 1. Patient characteristics**

|                                                                          | Number of patients (%)<br>N=40 |
|--------------------------------------------------------------------------|--------------------------------|
| Date enrolled into study                                                 | 21 Jul 2017 to 22 Aug 2019     |
| Date of start of treatment for patients                                  | 31 Jul 2017 to 5 Sep 2019      |
| Age at start of trial, years old                                         |                                |
| Median (IQR)                                                             | 53 (47.8, 61.1)                |
| Range                                                                    | 23 to 73                       |
| Gender                                                                   |                                |
| Male                                                                     | 33 (82.5)                      |
| Female                                                                   | 7 (17.5)                       |
| Ethnic group                                                             |                                |
| Chinese                                                                  | 36 (90.0)                      |
| Malay                                                                    | 3 (7.5)                        |
| Caucasian                                                                | 1 (2.5)                        |
| T-stage                                                                  |                                |
| T0                                                                       | 1 (2.5)                        |
| T1                                                                       | 3 (7.5)                        |
| T2                                                                       | 4 (10.0)                       |
| T3                                                                       | 9 (22.5)                       |
| T4                                                                       | 21 (52.5)                      |
| TX                                                                       | 2 (5.0)                        |
| N-stage                                                                  |                                |
| N0                                                                       | 3 (7.5)                        |
| N1                                                                       | 8 (20.0)                       |
| N2                                                                       | 16 (40.0)                      |
| N3                                                                       | 7 (17.5)                       |
| N3B                                                                      | 4 (10.0)                       |
| NX                                                                       | 2 (5.0)                        |
| M-stage                                                                  |                                |
| M0                                                                       | 22 (55.0)                      |
| M1                                                                       | 18 (45.0)                      |
| WHO Staging                                                              |                                |
| I                                                                        | 1 (2.5)                        |
| II                                                                       | 3 (7.5)                        |
| III                                                                      | 36 (90.0)                      |
| AJCC Staging                                                             |                                |
| 2                                                                        | 2 (5.0)                        |
| 3                                                                        | 7 (17.5)                       |
| 4A                                                                       | 9 (22.5)                       |
| 4B                                                                       | 7 (17.5)                       |
| 4C                                                                       | 15 (37.5)                      |
| ECOG performance status at baseline                                      |                                |
| 0                                                                        | 12 (30.0)                      |
| 1                                                                        | 28 (70.0)                      |
| Histopathologic type                                                     |                                |
| Squamous Cell, Non-keratinising                                          | 13 (32.5)                      |
| Undifferentiated Cell                                                    | 24 (60.0)                      |
| Unknown                                                                  | 1 (2.5)                        |
| Not reported                                                             | 2 (5.0)                        |
| Disease Status                                                           |                                |
| Metastatic                                                               | 34 (85.0)                      |
| Recurrent                                                                | 4 (10.0)                       |
| Not reported                                                             | 2 (5.0)                        |
| Sites of metastatic disease (for patients with metastatic disease, n=34) |                                |
| Single site                                                              | 20 (58.8)                      |
| Lung,                                                                    | 5 (14.7)                       |

|                                                                         |           |
|-------------------------------------------------------------------------|-----------|
| <i>Bone,</i>                                                            | 5 (14.7)  |
| <i>Liver,</i>                                                           | 5 (14.7)  |
| <i>Distant Lymph Node</i>                                               | 2 (5.9)   |
| <i>Neck</i>                                                             | 1 (2.9)   |
| <i>Oropharyngeal</i>                                                    | 1 (2.9)   |
| <i>Retropharyngeal Soft Tissue Bid Mediastinal Lymph</i>                | 1 (2.9)   |
| Two sites                                                               | 11 (32.4) |
| <i>Lung,Bone,</i>                                                       | 3 (8.8)   |
| <i>Lung,Liver,</i>                                                      | 1 (2.9)   |
| <i>Bone,Adrenal</i>                                                     | 1 (2.9)   |
| <i>Bone,Distant Lymph Node</i>                                          | 3 (8.8)   |
| <i>Bone,Liver,</i>                                                      | 1 (2.9)   |
| <i>Liver,Distant Lymph Node</i>                                         | 2 (5.9)   |
| Three sites                                                             | 3 (8.8)   |
| <i>Lung,Bone,Liver,</i>                                                 | 1 (2.9)   |
| <i>Bone,Liver,Distant Lymph Node</i>                                    | 2 (5.9)   |
| Site of metastatic disease (for patients with metastatic disease, n=34) |           |
| Lung                                                                    | 10 (29.4) |
| Bone                                                                    | 16 (47.1) |
| Liver                                                                   | 12 (35.3) |
| Adrenal                                                                 | 1 (2.9)   |
| Distant Lymph Node                                                      | 9 (26.5)  |
| Neck                                                                    | 1 (2.9)   |
| Oropharyngeal                                                           | 1 (2.9)   |
| Retropharyngeal Soft Tissue Bid Mediastinal Lymph                       | 1 (2.9)   |
| Prior treatment for:                                                    |           |
| Locally advanced disease only                                           | 2 (5.0)   |
| Recurrent/metastatic disease only                                       | 17 (42.5) |
| LA and first-line R/M therapy                                           | 21 (52.5) |
| Prior treatment regimen for recurrent/metastatic disease (n=38)         |           |
| Carboplatin + TS - 1                                                    | 1 (2.6)   |
| Cisplatin + TS - 1                                                      | 1 (2.6)   |
| Cisplatin/Carboplatin + Fluorouracil                                    | 1 (2.6)   |
| Endoxan                                                                 | 1 (2.6)   |
| Gemcitabine + Carboplatin + T - Cell Infusion                           | 1 (2.6)   |
| Gemcitabine + Cisplatin/Carboplatin                                     | 28 (73.7) |
| Tegafur/Uracil                                                          | 4 (10.5)  |
| Xeloda                                                                  | 1 (2.6)   |
| Prior treatment regimens for LA disease (n=23)                          |           |
| Bevacizumab + Gemcitabine + Cisplatin                                   | 2 (8.7)   |
| Carboplatin followed by (Cisplatin/Carboplatin + Fluorouracil)          | 1 (4.3)   |
| Cisplatin                                                               | 6 (26.1)  |
| Cisplatin followed by (Cisplatin/Carboplatin + Fluorouracil)            | 2 (8.7)   |
| Cisplatin followed by (Tegafur/Uracil)                                  | 1 (4.3)   |
| Cisplatin/Carboplatin + Fluorouracil                                    | 4 (17.4)  |
| Gemcitabine + Cisplatin/Carboplatin                                     | 1 (4.3)   |
| Mitomycin + Epirubicin + Cisplatin + Fluorouracil + Leucovorin          | 4 (17.4)  |
| Tegafur/Uracil followed by Cisplatin                                    | 1 (4.3)   |
| Unknown                                                                 | 1 (4.3)   |
| Number of patients who had prior RT                                     |           |
| No                                                                      | 12 (30.0) |
| Yes                                                                     | 26 (65.0) |
| Unknown                                                                 | 2 (5.0)   |

**Supplementary Table 2. Details on treatment-related adverse events**

|                                   | Number of patients with event (%) |         |         |         |         |           |
|-----------------------------------|-----------------------------------|---------|---------|---------|---------|-----------|
|                                   | Grade 1                           | Grade 2 | Grade 3 | Grade 4 | Grade 5 | Any Grade |
| Any trAE/SAE                      | 14 (35)                           | 13 (33) | 4 (10)  | 2 (5)   | 1 (3)   | 34 (85)   |
| Endocrine                         |                                   |         |         |         |         |           |
| Adrenal insufficiency             | 0                                 | 1 (3)   | 2 (5)   | 0       | 0       | 3 (8)     |
| Hyperthyroidism                   | 0                                 | 1 (3)   | 0       | 0       | 0       | 1 (3)     |
| Hypothyroidism                    | 3 (8)                             | 8 (20)  | 0       | 0       | 0       | 11 (28)   |
| Gastrointestinal                  |                                   |         |         |         |         |           |
| Constipation                      | 1 (3)                             | 0       | 0       | 0       | 0       | 1 (3)     |
| Bloating                          | 1 (3)                             | 0       | 0       | 0       | 0       | 1 (3)     |
| Diarrhea                          | 3 (8)                             | 0       | 0       | 0       | 0       | 3 (8)     |
| Vomiting                          | 1 (3)                             | 0       | 0       | 0       | 0       | 1 (3)     |
| Hematological                     |                                   |         |         |         |         |           |
| Anemia                            | 0                                 | 1 (3)   | 0       | 0       | 0       | 1 (3)     |
| Neutropenia                       | 0                                 | 1 (3)   | 0       | 0       | 0       | 1 (3)     |
| Hepatobiliary                     |                                   |         |         |         |         |           |
| ALT increase                      | 4 (10)                            | 1 (3)   | 0       | 0       | 0       | 5 (13)    |
| AST increase                      | 4 (10)                            | 1 (3)   | 1 (3)   | 0       | 0       | 6 (15)    |
| Lipase increase                   | 0                                 | 0       | 0       | 2 (5)   | 0       | 2 (5)     |
| Amylase increase                  | 0                                 | 1 (3)   | 1 (3)   | 0       | 0       | 2 (5)     |
| Bilirubin increase                | 1 (3)                             | 0       | 0       | 0       | 0       | 1 (3)     |
| Musculoskeletal                   |                                   |         |         |         |         |           |
| Myalgia                           | 1 (3)                             | 0       | 0       | 0       | 0       | 1 (3)     |
| Myositis                          | 0                                 | 0       | 1 (3)   | 0       | 0       | 1 (3)     |
| Neuromuscular junction disorder   | 0                                 | 0       | 1 (3)   | 0       | 0       | 1 (3)     |
| Skin                              |                                   |         |         |         |         |           |
| Dermatitis                        | 2 (5)                             | 0       | 0       | 0       | 0       | 2 (5)     |
| Rash acneiform                    | 3 (8)                             | 0       | 0       | 0       | 0       | 3 (8)     |
| Rash maculo-papular               | 11 (28)                           | 5 (13)  | 0       | 0       | 0       | 16 (40)   |
| Pruritus                          | 2 (5)                             | 0       | 0       | 0       | 0       | 2 (5)     |
| Genitourinary                     |                                   |         |         |         |         |           |
| Cystitis                          | 0                                 | 0       | 1 (3)   | 0       | 0       | 1 (3)     |
| Respiratory                       |                                   |         |         |         |         |           |
| Cough                             | 1 (3)                             | 0       | 0       | 0       | 0       | 1 (3)     |
| Pneumonia                         | 0                                 | 0       | 1 (3)   | 0       | 0       | 1 (3)     |
| Dyspnea                           | 1 (3)                             | 0       | 0       | 0       | 0       | 1 (3)     |
| Rhinitis                          | 1 (3)                             | 0       | 0       | 0       | 0       | 1 (3)     |
| Metabolic                         |                                   |         |         |         |         |           |
| Hyperglycemia                     | 0                                 | 1 (3)   | 1 (3)   | 0       | 0       | 2 (5)     |
| Hyponatremia                      | 0                                 | 1 (3)   | 0       | 0       | 0       | 1 (3)     |
| Hypomagnesemia                    | 1 (3)                             | 0       | 0       | 0       | 0       | 1 (3)     |
| General                           |                                   |         |         |         |         |           |
| Anorexia                          | 1 (3)                             | 0       | 0       | 0       | 0       | 1 (3)     |
| Fatigue                           | 7 (18)                            | 1 (3)   | 0       | 0       | 0       | 8 (20)    |
| Fever                             | 5 (13)                            | 1 (3)   | 0       | 0       | 0       | 6 (15)    |
| Pain                              | 1 (3)                             | 0       | 0       | 0       | 0       | 1 (3)     |
| Edema                             | 1 (3)                             | 0       | 0       | 0       | 0       | 1 (3)     |
| Others                            |                                   |         |         |         |         |           |
| Adverse drug reaction (nivolumab) | 0                                 | 1 (3)   | 0       | 0       | 0       | 1 (3)     |
| Death                             | 0                                 | 0       | 0       | 0       | 1 (3)   | 1 (3)     |

**Supplementary Table 3. Prior treatment and EBV associations with depth of response**

|                                    | n  | BOR, n (%)            | mPFS, , mths (95%   | mOS, mths (95%      |                                                            |
|------------------------------------|----|-----------------------|---------------------|---------------------|------------------------------------------------------------|
| <b>ECOG</b>                        |    |                       |                     |                     |                                                            |
| 0                                  | 12 | 6 (50.0%)             | 5.79 (1.68 11.70)   | 20.59 (2.17, 27.59) |                                                            |
| 1                                  | 28 | 9 (32.1%)             | 5.29 (2.79, 8.38)   | 14.86 (10.36, NE)   |                                                            |
|                                    |    | p=0.3110 <sup>^</sup> | p=0.8548            | p=0.9094            |                                                            |
| <b>Prior RT<sup>#</sup></b>        |    |                       |                     |                     |                                                            |
| No                                 | 12 | 4 (33.3%)             | 4.03 (1.84, 6.41)   | 18.56 (7.17, 30.01) |                                                            |
| Yes                                | 26 | 11 (42.3%)            | 5.88 (3.19 10.39)   | 21.71 (13.12, NE)   |                                                            |
|                                    |    | p=0.7281              | p=0.1396            | p=0.6146            |                                                            |
| <b>Prior Gem<sup>*</sup></b>       |    |                       |                     |                     |                                                            |
| Yes                                | 31 | 10 (32.3%)            | 5.26 (2.73, 6.28)   | 17.65 (10.19,       |                                                            |
| No                                 | 8  | 5 (62.5%)             | 11.83 (1.74, NE)    | NR                  |                                                            |
|                                    |    | p=0.2202 <sup>^</sup> | p=0.0628            | p=0.0744            |                                                            |
| <b>Prior Cisplatin<sup>*</sup></b> |    |                       |                     |                     |                                                            |
| Yes                                | 31 | 10 (32.3%)            | 5.26 (2.76, 6.28)   | 21.71 (10.36,       | OS results to be interpreted with care due to small sample |
| No                                 | 8  | 5 (62.5%)             | 10.39 (2.53, 17.65) | 19.84 (7.00, NE)    |                                                            |
|                                    |    | p=0.2202 <sup>^</sup> | p=0.2456            | p=0.9954            |                                                            |

# Excluded two patients with no Prior RT information

\* Excluded one patient with unknown prior treatment regimen

<sup>^</sup> p-value calculated using Fisher Exact test

|                       | No. of CR/PR (RECIST) | Median DoR, mths (95% CI) | No. of patients with tumour shrinkage | Depth of Response, % Median (IQR) |
|-----------------------|-----------------------|---------------------------|---------------------------------------|-----------------------------------|
| <b>EBV DNA groups</b> |                       |                           |                                       |                                   |
| EBV<7800 IU/ml        | 9                     | 5.85 (3.85, 8.98)         | 11                                    | 50.22 (33.33, 68.32)              |
| EBV≥7800 IU/ml        | 0                     | -                         | 4                                     | 18.43 (13.23, 35.91)              |
|                       |                       |                           |                                       | Mann Whitney U<br>p=0.1027        |

| EBV DNA groups | Depth of Response, % |                                             |                                         |                                                    |
|----------------|----------------------|---------------------------------------------|-----------------------------------------|----------------------------------------------------|
|                | All patients (n=26)  |                                             | Cohort of patient with tumour shrinkage |                                                    |
|                | No. of               | Median (IQR)                                | No. of pts w tumour                     | Median (IQR)                                       |
| EBV<7800 IU/ml | 15                   | 36.86 (-13.91, 58.22)                       | 11                                      | 50.22 (33.33, 68.32)                               |
| EBV≥7800 IU/ml | 10 <sup>#</sup>      | -70.59 (-125.51, Mann Whitney U<br>p=0.0060 | 4                                       | 18.43 (13.23, 35.91)<br>Mann Whitney U<br>p=0.1027 |

# 1 patient excluded as patient passed away before first planned post-treatment tumor scan

|                       | Treatment duration, weeks |                            |
|-----------------------|---------------------------|----------------------------|
|                       | No. of patients           | Median (IQR)               |
| <b>EBV DNA groups</b> |                           |                            |
| EBV<7800 IU/ml        | 15                        | 23.93 (9.97, 45.87)        |
| EBV≥7800 IU/ml        | 11                        | 9.97 (3.99, 21.80)         |
|                       |                           | Mann Whitney U<br>p=0.0515 |

**Supplementary Table 4. Samples for exploratory analysis.**

| <b>Patient ID</b> | <b>Site of Biopsy</b> | <b>RECIST Response</b> | <b>Site Response</b> | <b>Paired On-Treatment Biospy</b> | <b>Nanostring IO360*</b> | <b>Whole Exome-Seq^</b> | <b>Biopsy FFPE (miHC/IF)^</b> | <b>Included in Gene Signature analysis</b> |
|-------------------|-----------------------|------------------------|----------------------|-----------------------------------|--------------------------|-------------------------|-------------------------------|--------------------------------------------|
| 1001              | Primary               | PR                     | PR                   | Yes                               | Yes                      | Yes                     | Yes                           | Yes                                        |
| 1002              | Primary               | SD                     | SD                   | Yes                               | Yes                      | Yes                     | Yes                           | No                                         |
| 1003              | Primary               | PD                     | PD                   | Yes                               | Yes                      | Yes                     | Yes                           | Yes                                        |
| 1004              | Primary               | PR                     | PR                   | Yes                               | Yes                      | Yes                     | Yes                           | Yes                                        |
| 1005              | Liver                 | PD                     | PD                   | No                                | Yes                      | Yes                     | No                            | No                                         |
| 1007              | Primary               | PD                     | PD                   | Yes                               | Yes                      | Yes                     | Yes                           | Yes                                        |
| 1008              | Primary               | SD                     | SD                   | Yes                               | Yes                      | Yes                     | Yes                           | No                                         |
| 1010              | Lymph Node            | PD                     | PR                   | Yes                               | Yes                      | Yes                     | Yes                           | Yes                                        |
| 1012              | Lymph Node            | PR                     | PR                   | Yes                               | Yes                      | Yes                     | Yes                           | Yes                                        |
| 1013              | Primary               | PR                     | PR                   | Yes                               | Yes                      | Yes                     | Yes                           | Yes                                        |
| 1014              | Lymph Node            | PR                     | PR                   | Yes                               | Yes                      | No                      | Yes                           | Yes                                        |
| 1016              | Lymph Node            | PR                     | PR                   | No                                | Yes                      | Yes                     | No                            | No                                         |
| 1018              | Lymph Node            | SD                     | SD                   | Yes                               | Yes                      | Yes                     | Yes                           | No                                         |
| 1019              | Primary               | PD                     | PD                   | Yes                               | Yes                      | Yes                     | Yes                           | Yes                                        |
| 1020              | Primary               | PD                     | PD                   | Yes                               | Yes                      | Yes                     | Yes                           | Yes                                        |
| 1021              | Primary               | SD                     | SD                   | Yes                               | Yes                      | Yes                     | Yes                           | No                                         |
| 1023              | Primary               | PD                     | PD                   | No                                | Yes                      | Yes                     | No                            | No                                         |
| 1028              | Primary               | PD                     | PD                   | Yes                               | Yes                      | No                      | No                            | Yes                                        |
| 1029              | Primary               | PD                     | PR                   | Yes                               | Yes                      | Yes                     | Yes                           | Yes                                        |
| 1032              | Primary               | SD                     | SD                   | Yes                               | Yes                      | Yes                     | Yes                           | No                                         |
| 1033              | Primary               | SD                     | SD                   | Yes                               | Yes                      | Yes                     | Yes                           | No                                         |
| 1040              | Primary               | PR                     | PR                   | Yes                               | Yes                      | Yes                     | No                            | Yes                                        |

\* Experiment and analysis ran for both pre- and on-treatment samples where applicable.

^ Experiment and analysis ran for pre-treatment samples only.

**Supplementary Table 5. Antibodies used for multiplex IHC/IF staining**

| <b>Antibody</b> | <b>Clone</b> | <b>Dilution</b> | <b>Catalogue No.</b> | <b>Source</b> |
|-----------------|--------------|-----------------|----------------------|---------------|
| CD39            | OTI2B10      | 1:800           | TA804559             | Origene       |
| CD8             | 4B11         | 1:100           | NCL-L-CD8-4B11       | Leica         |
| FOXP3           | 136A/E7      | 1:200           | ab20034              | Abcam         |
| TCF1            | C63D9        | 1:600           | 2203S                | CST           |
| PD1             | NAT105       | 1:200           | 315M-96              | Cell Marque   |
| CTLA4           | IHC004       | 1:400           | IHC004-100           | GENEAB        |

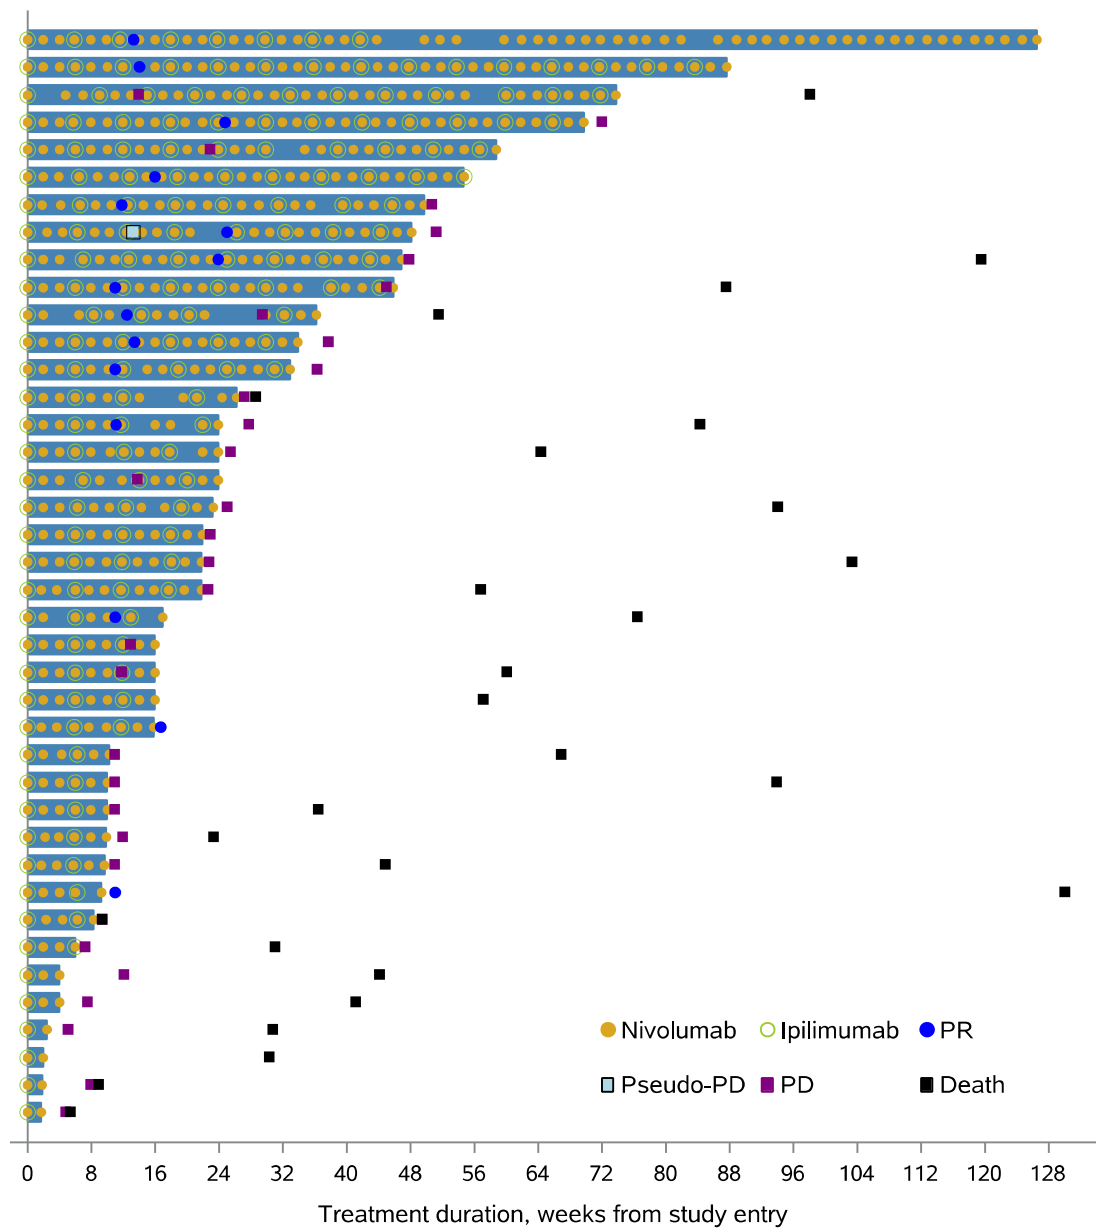

**Supplementary Figure 1.** Swimmers plot summarizing treatment duration, response, and outcomes over time for patients in study. n= 40.



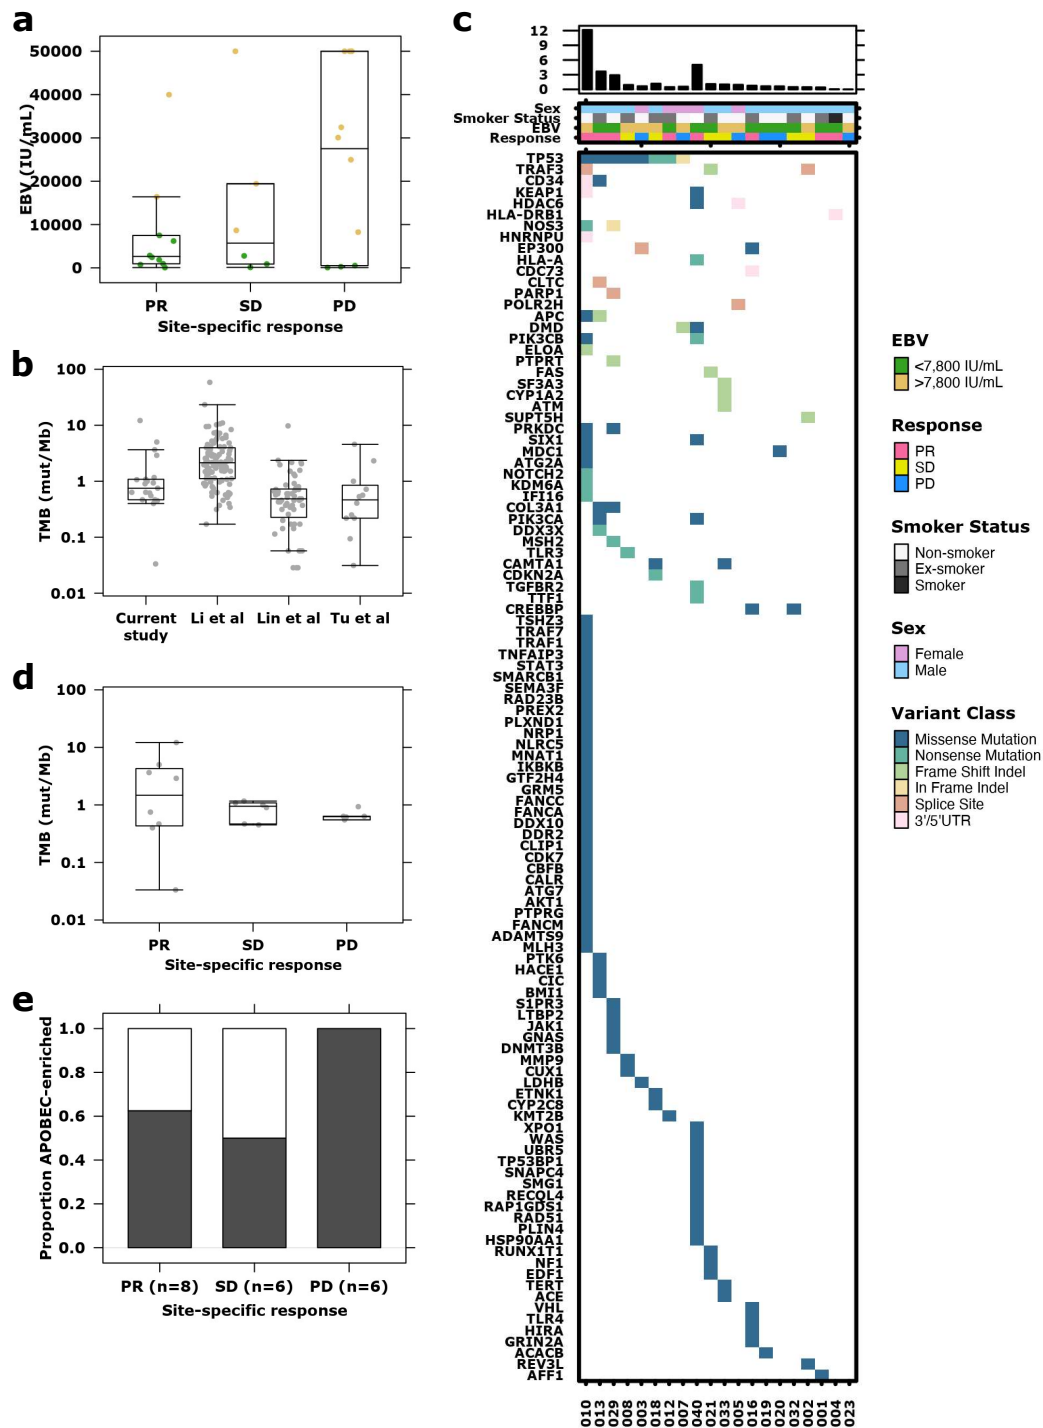

**Supplementary Figure 2.** Genomic profiles revealed by whole exome sequencing.

- EBV viral load by site-specific response, with green and yellow showing EBV-low (<7,800 IU/mL) and EBV-high (>7,800 IU/mL) groups respectively:  $n_{PR} = 10$ ,  $n_{SD} = 6$ ,  $n_{PD} = 10$ .
- Comparison of tumor mutation burden across NPC genomics studies<sup>1,2,3</sup>:  $n_{\text{current\_study}} = 21$ ,  $n_{Li} = 110$ ,  $n_{Lin} = 56$ ,  $n_{Tu} = 12$ .
- Extended tumor co-mutation plot with tumor mutation burden and clinical covariates showing all mutated NPC-related genes in this cohort.
- Tumor mutation burden by site-specific response:  $n_{PR} = 8$ ,  $n_{SD} = 6$ ,  $n_{PD} = 6$ .
- Proportion of APOBEC-enriched samples by site-specific response.

(a,b,d) Tukey boxplots are shown with the box indicating quartiles with median at middle, and the whiskers drawn at the lowest and highest points within 1.5 interquartile range of the lower and upper quartiles, respectively.

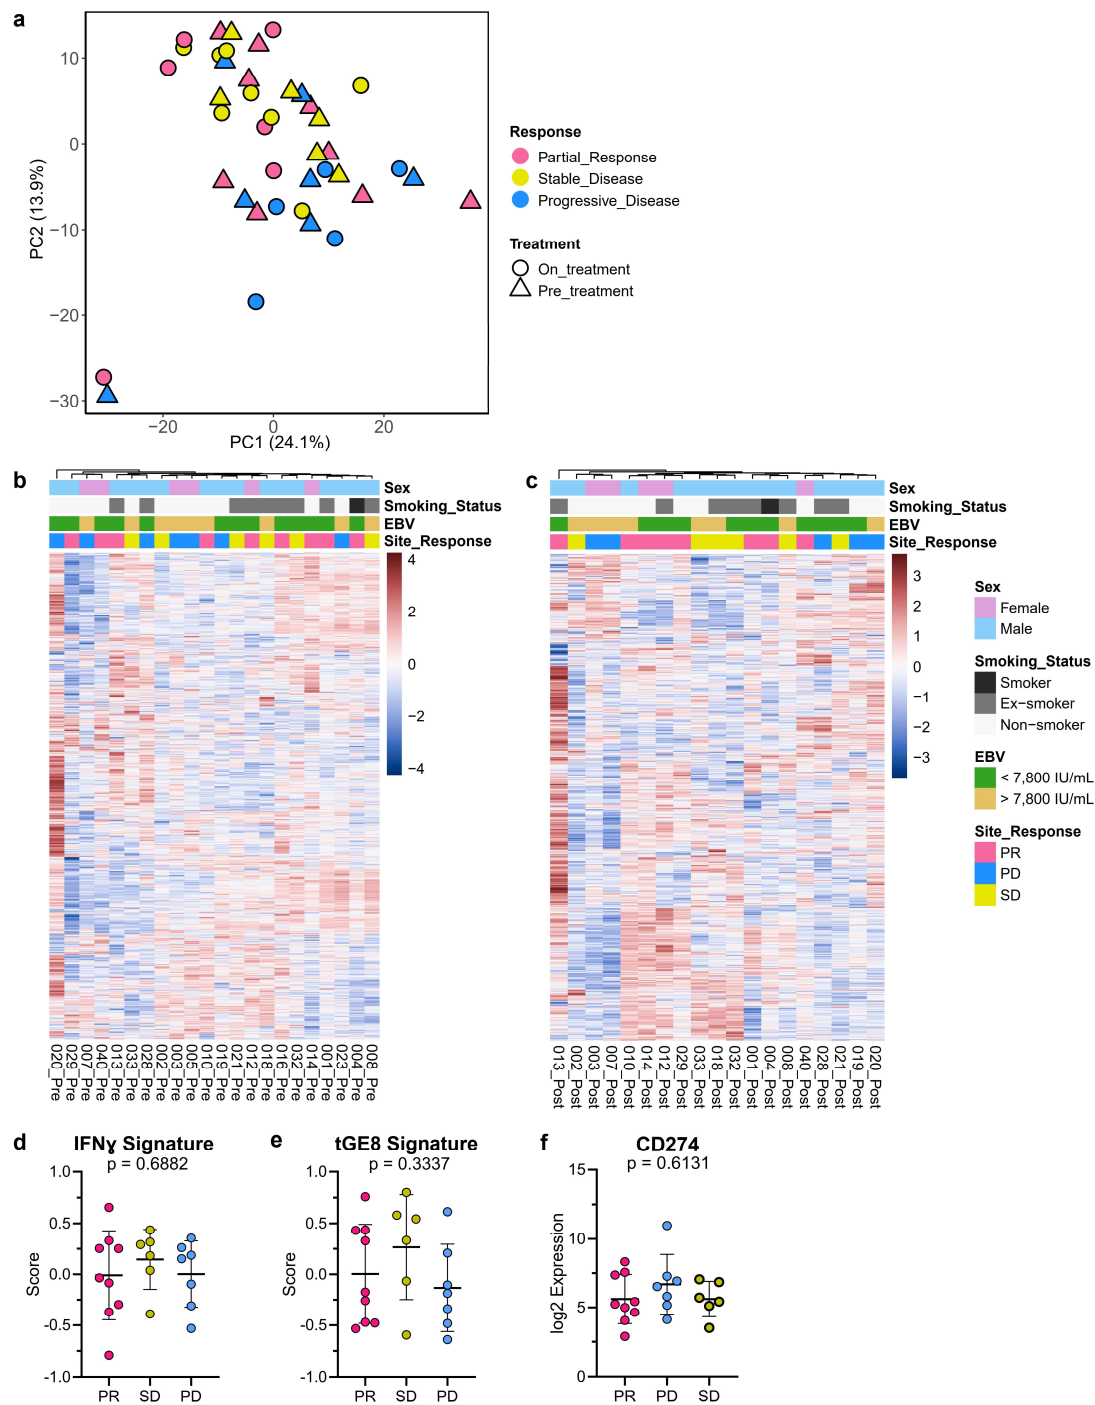

**Supplementary Figure 3.** Overview of gene expression profile using Nanostring IO360 panel.

a. PCA plot showing distribution of all samples used in the analysis (n= 41).

b-c. Heatmap showing unsupervised clustering of pre-treatment (n= 22) (a) and on-treatment (n= 19) (b) samples (750 genes).

d-f. Correlation between IFN $\gamma$  signature score<sup>4</sup> (d), cytotoxic T-cells transcriptional signature score<sup>5</sup> (e) and CD274 (PD-L1) mRNA (f) expression with response at pre-treatment setting (n<sub>PR</sub> = 9, n<sub>SD</sub> = 6, n<sub>PD</sub> = 7). Statistical analyses were performed with two-sided Kruskal-Wallis test. Line represents mean with SD. Each dot represents an individual sample.

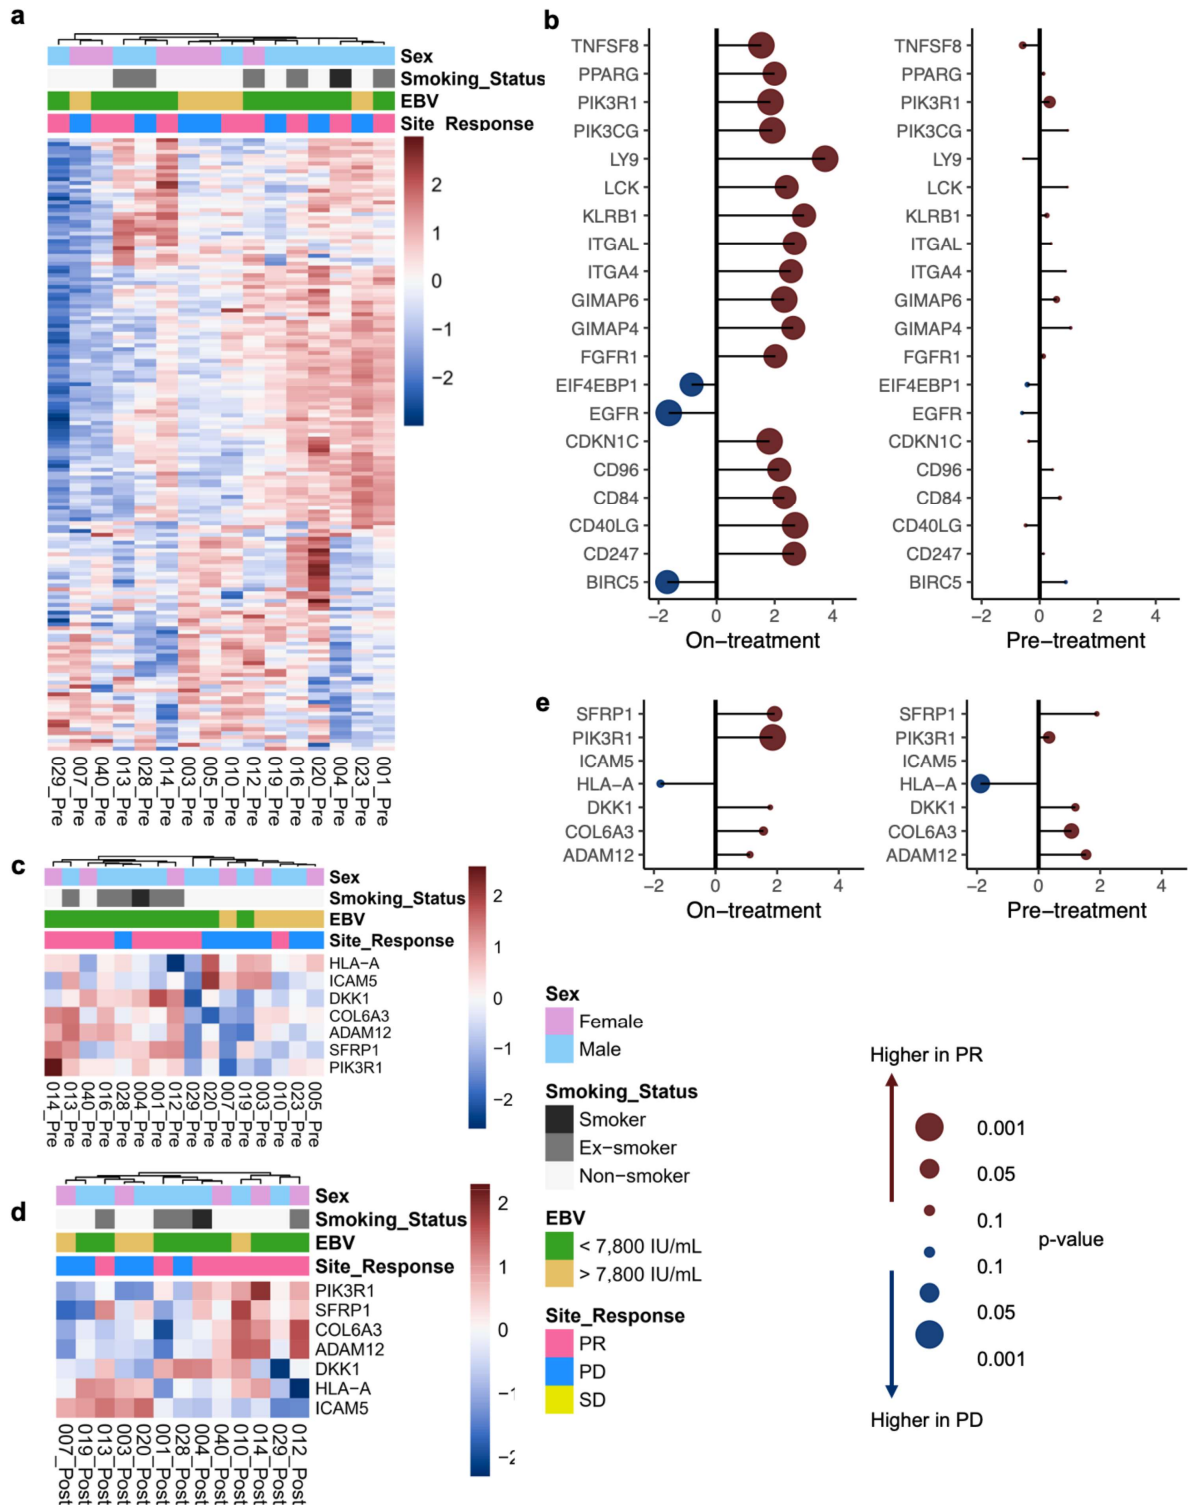

**Supplementary Figure 4.** Dynamics of treatment response in pre- vs on-treatment samples.

a. On-treatment genes of interest in pre-treatment samples.

b. Comparison of on-treatment genes of interest between PR (n=9) and PD (n=7) responders in on-treatment (left) and pre-treatment (right) samples. The length of the stem indicates the effect size of median difference in expression with points towards the left (blue dots) showing higher expression in PD and right (red dots) showing higher expression in PR. The size of the dot indicates P-values by Mann-Whitney U-test.

c-d. Pre-treatment genes of interest in (c) pre-treatment and (d) on-treatment samples.

e. Comparison of pre-treatment genes of interest between PR (n=8) and PD (n=6) responders in on-treatment (left) and pre-treatment (right) samples.

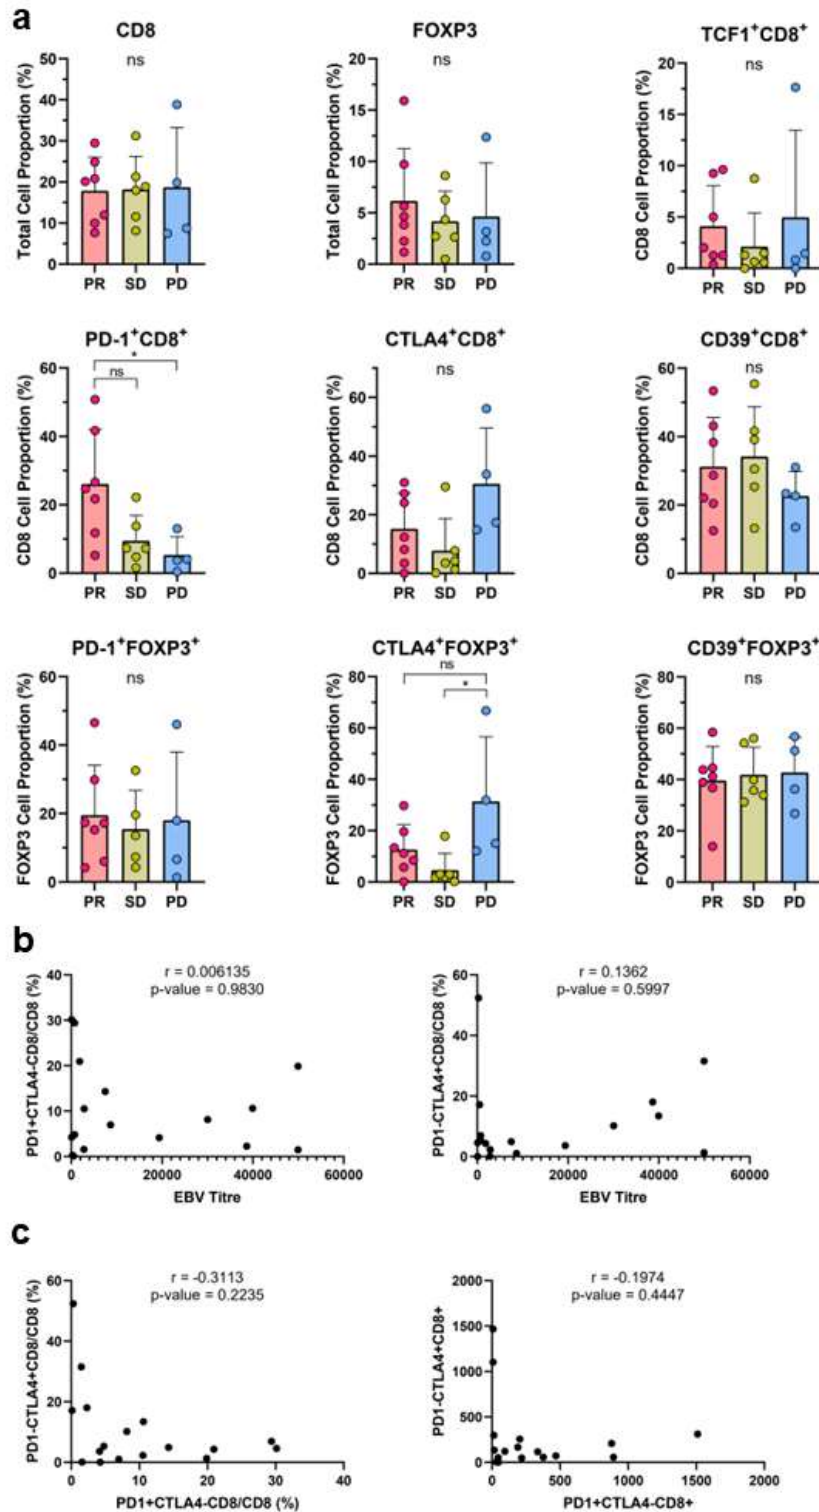

**Supplementary Figure 5.** Cell proportion quantification using multiplex-IHC/IF.

a. Cell type proportion with categorized by biopsy site response.  $n_{PR} = 7$ ,  $n_{SD} = 6$ ,  $n_{PD} = 4$ . Statistical analyses were performed using ANOVA with post-hoc Tukey test, adjusted for multiple comparison. Bar plot shows mean with SD.

b. Correlation plot between EBV titre and PD1<sup>+</sup>CTLA4<sup>-</sup>CD8 (left) or PD1<sup>-</sup>CTLA4<sup>+</sup>CD8 (right) T-cell proportion determined using mIHC/IF (Spearman correlation).

c. Correlation plot between PD1<sup>+</sup>CTLA4<sup>-</sup>CD8 and PD1<sup>-</sup>CTLA4<sup>+</sup>CD8 T-cell proportion (left) and absolute cell count (right).

(a, b, c)  $n = 17$ . Each dot represents an individual sample. Source data are provided as a Source Data file. PR: Partial response, SD: Stable disease, PD: Progressive disease.

## Supplementary References

1. Li, Y.Y., et al. Exome and genome sequencing of nasopharynx cancer identifies NF-kappaB pathway activating mutations. *Nat Commun* 8, 14121 (2017).
2. Lin, D.C., et al. The genomic landscape of nasopharyngeal carcinoma. *Nat Genet* 46, 866-871 (2014).
3. Tu, C., *et al.* Identification of genomic alterations in nasopharyngeal carcinoma and nasopharyngeal carcinoma-derived Epstein-Barr virus by whole-genome sequencing. *Carcinogenesis* 39, 1517-1528 (2018).
4. Mariathasan, S., et al. TGF $\beta$  attenuates tumour response to PD-L1 blockade by contributing to exclusion of T cells. *Nature* 554, 544-548 (2018).
5. Ayers, M., *et al.* IFN- $\gamma$ -related mRNA profile predicts clinical response to PD-1 blockade. *The Journal of Clinical Investigation* 127, 2930-2940 (2017).
